# Supplementary material for: Exposure assessment of adults living near unconventional oil and natural gas development and reported health symptoms in southwest Pennsylvania, USA
Source: PLoS One. 2020 Aug 18;15(8):e0237325. doi: 10.1371/journal.pone.0237325 (PMC7446921; doi:10.1371/journal.pone.0237325)
Supplement: S1 Appendix — Lines 7–13 prepare a sample dataset of twenty potential symptoms and fifty individual respondents to mimic a subset of the data used in this study. For each respondent, 1s and 0s were used randomly for each symptom. A 1 means they did have that symptom, 0 means they did not. Now we have a dataset of fifty respondents and what symptoms they did or did not have. Line 16 creates a randomized list of exposure, one for each of the fifty respondents. In our study, each respondent had a measure of cumulative well density (CWD), an inverse distance weighting (IDW) score, and a measure of estimated annual emissions concentration (AEC). Line 16 creates an exposure variable that ranges from 0 to 50 (no units), with 0 being no exposure and 50 being representative of high exposure, though in our sample there was no limit to how high an exposure measure could go. Line 19 uses titan() to run the TITAN analysis, taking the reported symptoms and exposure values to determine if certain symptoms occur more or less at different levels of exposure. For example, when the exposure measure reaches 12, the model is looking for any symptoms that stand out as occurring more frequently at that exposure level. Indicator values (range 0–100) are used to score each symptom’s relationship to that exposure level, or gradient. A high indicator value shows a strong relationship with the gradient at a certain level. Then, the model determines if that relationship is positive or inverse. In ecological studies, one might study how changes in dissolved oxygen (DO) in a pond ecosystem cause certain species to die off or thrive as levels of DO change. When we begin to see a certain species appear in the pond, we can hypothesize that there may also be a change in DO as well since that species is an indicator of a certain threshold, or level of DO. Lines 22–29 takes information from the TITAN analysis and creates a table. For this table, the rows each represent the different symptoms, while columns are infor [file pone.0237325.s001.r]

#TITAN Analysis Demo
require(TITAN2)
require(dplyr)
require(ggplot2)

#Create Species Data Set for running the TITAN analysis. 
n=20 #For the example, we will say there are 20 possible symptoms someone would report.
prefix="symptom." #Lines 8-10 create the symptom name column headers for our dataset to be symptom.1, symptom.2, and so on. 
suffix=seq(1:n)   
colnames=paste(prefix,suffix,sep="") 
mm=matrix(rbinom(50 * 20, 1, 0.5), ncol = 20, nrow = 50) #Create matrix of the 20 symptoms and assume we have 50 people, or samples.
df=as.data.frame(mm) #Transform the matrix too a dataframe for analysis. 
colnames(df)=colnames #Add the symptom names we created in line 10 to the dataframe column headers. 

#Generate exposure list
Exposure=data.frame(Exposures=sample(0:50,size=50)) #we are making a random list of numbers to represent exposure (ex. IDW score). They range from 0 to 50 and there are 50 scores, one for each sample. 

#Run TITAN on all symptoms against Exposure
titan_1=titan(Exposure,df) #This line executes the TITAN analysis and will take 1-2 minutes to run. 

#Create a final table
titan_table=titan_1$sppmax #This will create a matrix of summary data for each symptom that was generated during analysis.
titan_table=as.data.frame(titan_table) #Again, we turn teh matrix into a dataframe for easier analysis
titan_table = add_rownames(titan_table, "Symptom_Name") #We rename our column that lists symptoms as Symptom_Name. Each row is now a symptom name and the columns are summary information from the TITAN analysis. 
titan_table=titan_table[titan_table$freq>=10,] #Remove symptoms that frequency reported was <10 times. 
titan_table=titan_table[,c(1,4:8)] #Omit columns we are not using to clean up the dataframe. 
titan_table$new=titan_table$IndVal; titan_table$new[titan_table$maxgrp==1]=-1*titan_table$new[titan_table$maxgrp==1] #For plotting purposes, any symptom that is negatively associated with a gradient has a maxgrp=1, 
                                                                                                                    #this code takes the indicator value and adds a minus sign in front of it to make it negative.
colnames(titan_table)=c("Symptom_Name","freq","maxgrp","IndVal","obsiv.prob","zscore","new") #Rename the column headers.


#Create Bar Plot
x11(20,12) #Open a new window for plotting. 
ggplot(data=titan_table, aes(x=reorder(Symptom_Name,new),y=new))+ #Plot the symptom name on X with the Indicator values (new) on the Y axis
  geom_bar(stat='identity',col='black')+                           #Tell ggplot this is a bar plot
  labs(x="Symptom Name", y="Indicator Value")                      #Label the X and Y axes
  

#Additional table filters we used (add in after line 27)
titan_table=titan_table[titan_table$`obsiv.prob`<=0.0500,] #This Remove symptoms that are not significant at p<0.05. It does not work for this specific sample dataset.
titan_table=titan_table[titan_table$zscore>=1,] #This keeps only symptoms with a zscore higher than 1 as high z-scores indicate greater symptom sensitivity to changes in the gradient.
                                                #This also did not make sense to do with this sample data set. 
